# Supplementary material for: Protomers of the green and cyan fluorescent protein chromophores investigated using action spectroscopy
Source: Royal Society of Chemistry journal article supplement (doi:10.1039/d3cp02661b), 2023-01-01
Supplement: d3cp02661b1.pdf [file d3cp02661b1.pdf]

*Electronic Supplementary Information for*

**Protomers of the green and cyan fluorescent protein  
chromophores investigated using action spectroscopy**

Eleanor K. Ashworth, Jordan Dezalay, Christopher R. M. Ryan, Christian Ieritano, W. Scott Hopkins, Isabelle Chambrier, Andrew N. Cammidge, Mark H. Stockett, Jennifer A. Noble, and James N. Bull

# Cyan <sup>1</sup>H NMR spectrum

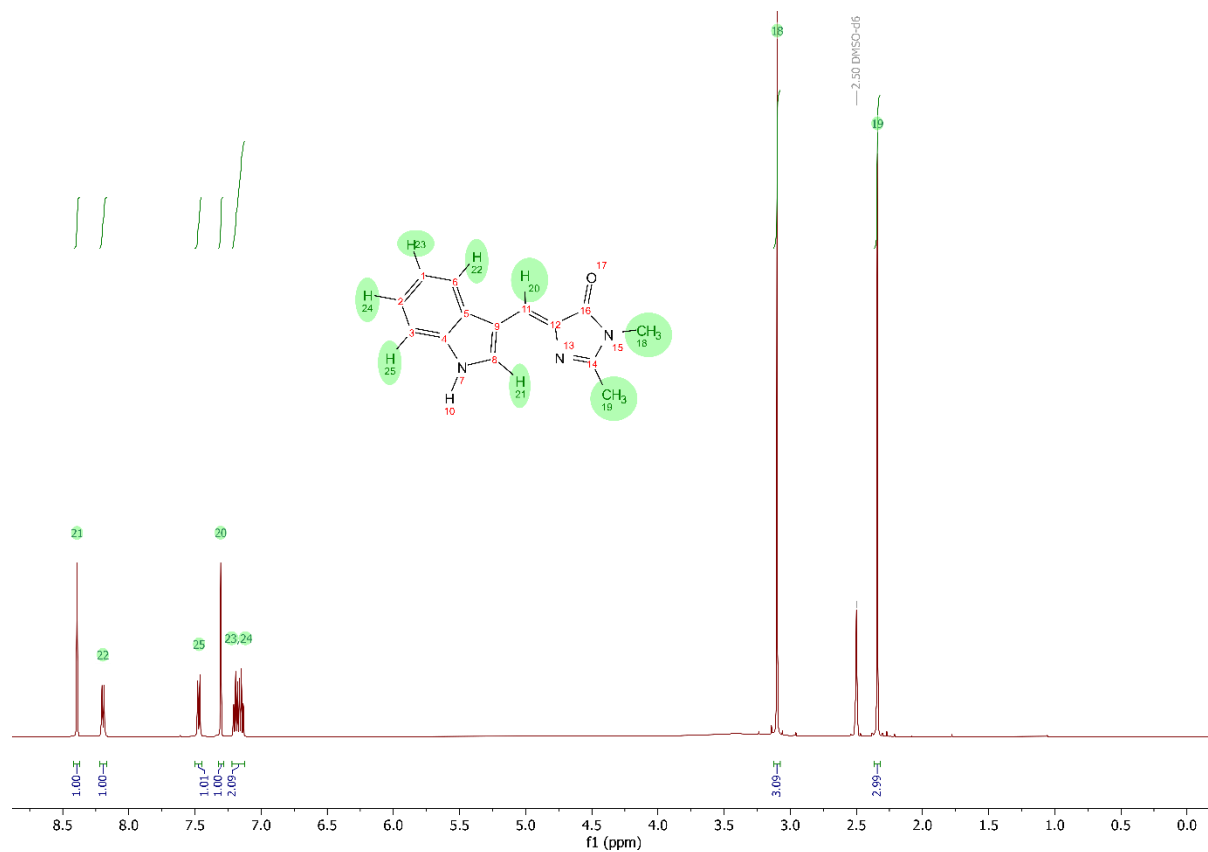

Figure 1 <sup>1</sup>H NMR spectrum of Cyan in DMSO, with proton assignments highlighted in green.

## Optimised geometries

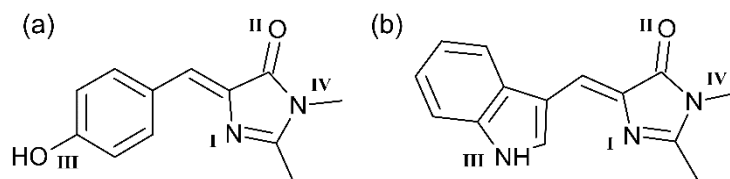

**Figure 2** Protonation sites for (a) pHBDI and (b) Cyan. The numbering corresponds to the spectra in the main manuscript and the optimised geometries given below.

### Z-pHBDI<sup>+</sup> – protomer I $E_{\text{HF}} = -724.703206$ au

|   |           |           |           |
|---|-----------|-----------|-----------|
| C | 4.151718  | 0.345784  | 0.018671  |
| C | 3.859824  | -0.976629 | 0.379977  |
| C | 2.553589  | -1.429808 | 0.314441  |
| C | 1.502253  | -0.578965 | -0.079283 |
| C | 1.826098  | 0.740494  | -0.465819 |
| C | 3.126780  | 1.199894  | -0.422331 |
| H | 2.334272  | -2.461941 | 0.588324  |
| H | 1.066340  | 1.400861  | -0.884467 |
| C | 0.161905  | -1.111380 | -0.084804 |
| H | 0.061062  | -2.199731 | -0.094214 |
| O | 5.390918  | 0.858342  | 0.047925  |
| C | -1.031777 | -0.473334 | -0.050149 |
| C | -2.340211 | -1.136852 | -0.105149 |
| C | -2.632794 | 1.103510  | 0.132996  |
| N | -1.320709 | 0.901787  | 0.086741  |
| N | -3.281480 | -0.055740 | 0.002857  |
| C | -3.285403 | 2.420402  | 0.309569  |
| H | -3.915643 | 2.404909  | 1.208699  |
| H | -2.541944 | 3.217318  | 0.402378  |
| H | -3.934071 | 2.630408  | -0.551428 |
| O | -2.648130 | -2.292311 | -0.219864 |
| C | -4.724771 | -0.250561 | -0.016708 |
| H | -5.168949 | 0.088109  | 0.925760  |
| H | -5.170002 | 0.285672  | -0.861884 |
| H | -4.895188 | -1.324497 | -0.135130 |
| H | 4.657235  | -1.647765 | 0.700170  |
| H | 3.385133  | 2.207332  | -0.742700 |
| H | 6.032863  | 0.204618  | 0.344228  |
| H | -0.641345 | 1.628793  | 0.260126  |

**Z-pHBDI<sup>+</sup> – protomer II**       $E_{HF} = -724.687669$  au

|   |           |           |           |
|---|-----------|-----------|-----------|
| C | 4.148069  | 0.342814  | 0.000000  |
| C | 3.876418  | -1.038120 | -0.000001 |
| C | 2.566241  | -1.463117 | -0.000001 |
| C | 1.490959  | -0.538033 | 0.000000  |
| C | 1.793201  | 0.852279  | 0.000000  |
| C | 3.098237  | 1.282935  | 0.000000  |
| H | 2.355608  | -2.533186 | -0.000001 |
| H | 0.979190  | 1.572827  | 0.000001  |
| C | 0.169465  | -1.052673 | 0.000000  |
| H | 0.110931  | -2.145874 | -0.000001 |
| O | 5.388565  | 0.833818  | 0.000000  |
| C | -1.043121 | -0.390347 | 0.000000  |
| C | -2.324629 | -1.019583 | 0.000000  |
| C | -2.529859 | 1.174534  | 0.000000  |
| N | -1.251353 | 0.990721  | 0.000001  |
| N | -3.237484 | -0.045829 | 0.000000  |
| C | -3.243054 | 2.475813  | 0.000001  |
| H | -3.881821 | 2.573704  | 0.888479  |
| H | -2.504302 | 3.280886  | 0.000002  |
| H | -3.881819 | 2.573705  | -0.888479 |
| O | -2.716900 | -2.277096 | 0.000000  |
| C | -4.686477 | -0.205075 | 0.000000  |
| H | -5.107752 | 0.262773  | 0.896179  |
| H | -5.107752 | 0.262774  | -0.896179 |
| H | -4.924373 | -1.271112 | -0.000001 |
| H | 4.693992  | -1.759154 | -0.000001 |
| H | 3.347151  | 2.342250  | 0.000001  |
| H | 6.048124  | 0.131275  | 0.000000  |
| H | -1.971339 | -2.887443 | 0.000000  |

**Z-pHBDI<sup>+</sup> – protomer III**      $E_{HF} = -724.621577$  au

|   |           |           |           |
|---|-----------|-----------|-----------|
| C | -3.811617 | -1.066862 | -0.000007 |
| C | -2.490250 | -1.502354 | -0.000006 |
| C | -1.417103 | -0.590483 | -0.000002 |
| C | -1.693419 | 0.792212  | 0.000004  |
| C | -3.005014 | 1.257488  | 0.000003  |
| H | -2.288873 | -2.572656 | -0.000009 |
| H | -0.864322 | 1.497295  | 0.000008  |
| C | -0.056675 | -1.122600 | 0.000000  |
| H | 0.051045  | -2.208341 | -0.000001 |
| O | -5.398622 | 0.825184  | 0.000000  |
| C | 1.097149  | -0.426616 | 0.000003  |
| C | 2.434578  | -1.117522 | 0.000006  |
| C | 2.594518  | 1.119407  | 0.000007  |
| N | 1.299152  | 0.952076  | 0.000007  |
| N | 3.328430  | -0.048572 | 0.000009  |
| C | 3.267149  | 2.442259  | -0.000011 |
| H | 3.909244  | 2.544260  | -0.885746 |
| H | 2.513989  | 3.233495  | 0.000108  |
| H | 3.909467  | 2.544190  | 0.885568  |
| O | 2.710215  | -2.293139 | -0.000001 |
| C | 4.771627  | -0.188987 | -0.000003 |
| H | 5.207737  | 0.267524  | -0.896526 |
| H | 5.207750  | 0.267496  | 0.896528  |
| H | 4.991208  | -1.261050 | -0.000020 |
| H | -4.640211 | -1.774549 | -0.000010 |
| H | -3.234623 | 2.321209  | 0.000008  |
| H | -5.900489 | 0.588889  | -0.799027 |
| H | -5.900475 | 0.588916  | 0.799044  |

**Z-pHBDI<sup>+</sup> – protomer IV**      $E_{HF} = -724.651374$  au

|   |           |           |           |
|---|-----------|-----------|-----------|
| C | -4.133844 | 0.354089  | -0.080032 |
| C | -3.869729 | -1.025106 | -0.051087 |
| C | -2.560755 | -1.458775 | 0.006919  |
| C | -1.482410 | -0.543206 | 0.037716  |
| C | -1.776264 | 0.844712  | 0.007471  |
| C | -3.078755 | 1.285598  | -0.050426 |
| H | -2.355782 | -2.529437 | 0.029610  |
| H | -0.965181 | 1.567692  | 0.030589  |
| C | -0.162308 | -1.079171 | 0.097651  |
| H | -0.092768 | -2.170115 | 0.115650  |
| O | -5.373282 | 0.854511  | -0.136019 |
| C | 1.059192  | -0.454481 | 0.138139  |
| C | 2.284841  | -1.206728 | 0.198761  |
| C | 2.559232  | 1.171759  | 0.174373  |
| N | 1.315499  | 0.929399  | 0.129019  |
| N | 3.379533  | -0.071305 | 0.222470  |
| C | 3.238410  | 2.490889  | 0.185842  |
| H | 3.836648  | 2.636912  | -0.724434 |
| H | 2.476827  | 3.273532  | 0.237384  |
| H | 3.909801  | 2.582561  | 1.051526  |
| O | 2.627338  | -2.345975 | 0.221831  |
| C | 4.369798  | -0.243494 | -0.881115 |
| H | 3.848194  | -0.095846 | -1.831747 |
| H | 5.173366  | 0.488593  | -0.764723 |
| H | 4.763053  | -1.262338 | -0.817330 |
| H | -4.689791 | -1.743117 | -0.074030 |
| H | -3.318733 | 2.346768  | -0.073900 |
| H | -6.034127 | 0.153906  | -0.152738 |
| H | 3.866365  | -0.140581 | 1.121974  |

***E*-pHBDI<sup>+</sup> – protomer I**       $E_{HF} = -724.869393$  au

|   |           |           |           |
|---|-----------|-----------|-----------|
| C | 4.136764  | 0.246957  | -0.000004 |
| C | 3.846270  | -1.120673 | 0.000011  |
| C | 2.537492  | -1.529464 | 0.000015  |
| C | 1.475305  | -0.603058 | 0.000004  |
| C | 1.795018  | 0.771111  | -0.000010 |
| C | 3.100477  | 1.185916  | -0.000014 |
| H | 2.320554  | -2.589945 | 0.000026  |
| H | 1.005877  | 1.505808  | -0.000018 |
| C | 0.158075  | -1.143413 | 0.000005  |
| H | 0.142105  | -2.230640 | 0.000009  |
| O | 5.383332  | 0.719588  | -0.000010 |
| C | -1.081585 | -0.585930 | -0.000003 |
| C | -1.583371 | 0.785272  | 0.000008  |
| C | -3.338046 | -0.654348 | -0.000005 |
| N | -2.246779 | -1.388704 | -0.000008 |
| N | -3.006034 | 0.635070  | 0.000010  |
| C | -4.721326 | -1.170571 | -0.000013 |
| H | -5.252446 | -0.808306 | -0.880591 |
| H | -4.733297 | -2.256952 | -0.000009 |
| H | -5.252457 | -0.808299 | 0.880557  |
| O | -1.042942 | 1.857231  | 0.000016  |
| C | -3.919348 | 1.764889  | 0.000004  |
| H | -4.542035 | 1.750493  | -0.891825 |
| H | -4.542074 | 1.750472  | 0.891805  |
| H | -3.310033 | 2.664113  | 0.000029  |
| H | 4.647762  | -1.847665 | 0.000018  |
| H | 3.351458  | 2.236400  | -0.000027 |
| H | 6.029382  | 0.009422  | 0.000000  |
| H | -2.252565 | -2.394142 | -0.000024 |

***E*-pHBDI<sup>+</sup> – protomer II**       $E_{HF} = -724.846210$  au

|   |           |           |           |
|---|-----------|-----------|-----------|
| C | -3.951478 | 0.291774  | 0.027408  |
| C | -3.686607 | -0.927001 | -0.601285 |
| C | -2.424803 | -1.469610 | -0.537697 |
| C | -1.378396 | -0.796314 | 0.110709  |
| C | -1.677936 | 0.406497  | 0.778383  |
| C | -2.939785 | 0.945852  | 0.740206  |
| H | -2.230293 | -2.418929 | -1.018666 |
| H | -0.931612 | 0.872433  | 1.410915  |
| C | -0.069875 | -1.380638 | 0.104707  |
| H | -0.012516 | -2.463669 | 0.058449  |
| O | -5.151128 | 0.871717  | 0.015962  |
| C | 1.141540  | -0.760791 | 0.126920  |
| C | 1.487187  | 0.610292  | -0.135016 |
| C | 3.291846  | -0.629252 | 0.129130  |
| N | 2.337990  | -1.470998 | 0.261786  |
| N | 2.809120  | 0.678455  | -0.129333 |
| C | 4.743316  | -0.898877 | 0.217424  |
| H | 5.195372  | -0.335102 | 1.034644  |
| H | 4.890725  | -1.959289 | 0.395146  |
| H | 5.251117  | -0.616615 | -0.705666 |
| O | 0.782207  | 1.664782  | -0.438923 |
| C | 3.618817  | 1.857566  | -0.394803 |
| H | 4.327464  | 1.999057  | 0.417288  |
| H | 4.157120  | 1.732233  | -1.331726 |
| H | 2.970416  | 2.724744  | -0.463977 |
| H | -4.476546 | -1.449051 | -1.125178 |
| H | -3.182143 | 1.850378  | 1.278665  |
| H | -5.794435 | 0.349970  | -0.469999 |
| H | -0.166014 | 1.472680  | -0.419902 |



**Z-Cyan<sup>+</sup> – protomer I**       $E_{\text{HF}} = -781.045317 \text{ au}$

|   |           |           |           |
|---|-----------|-----------|-----------|
| C | 1.176526  | -1.298217 | -0.059317 |
| C | -0.215264 | -1.563656 | -0.208850 |
| H | -0.514725 | -2.601316 | -0.375709 |
| C | -1.263875 | -0.705945 | -0.118985 |
| C | -2.673313 | -1.065494 | -0.278470 |
| C | -2.502726 | 1.117639  | 0.333712  |
| N | -1.263671 | 0.653999  | 0.252776  |
| N | -3.374045 | 0.153398  | 0.019531  |
| C | -2.872451 | 2.498828  | 0.718576  |
| H | -3.523966 | 2.478016  | 1.602079  |
| H | -1.981322 | 3.092954  | 0.940764  |
| H | -3.430128 | 2.975489  | -0.098646 |
| O | -3.211102 | -2.099324 | -0.578737 |
| C | -4.824487 | 0.267905  | -0.019144 |
| H | -5.214216 | 0.533482  | 0.969791  |
| H | -5.129730 | 1.014515  | -0.760564 |
| H | -5.208952 | -0.713860 | -0.310553 |
| C | 2.070231  | -2.281336 | 0.359247  |
| H | 1.880917  | -3.331704 | 0.558184  |
| C | 1.949757  | -0.070780 | -0.173709 |
| C | 3.262043  | -0.386757 | 0.237873  |
| N | 3.287766  | -1.738063 | 0.557305  |
| H | 4.100039  | -2.244780 | 0.877363  |
| C | 4.303734  | 0.541018  | 0.244168  |
| C | 1.705093  | 1.216970  | -0.683721 |
| C | 4.015177  | 1.821696  | -0.203305 |
| C | 2.733217  | 2.149589  | -0.680252 |
| H | 5.306585  | 0.269670  | 0.571054  |
| H | 4.800733  | 2.575580  | -0.215732 |
| H | 2.555197  | 3.146989  | -1.079833 |
| H | 0.754854  | 1.473824  | -1.151750 |
| H | -0.438794 | 1.191649  | 0.489219  |

**Z-Cyan<sup>+</sup> – protomer II**       $E_{\text{HF}} = -781.027437 \text{ au}$

|   |           |           |           |
|---|-----------|-----------|-----------|
| C | -1.164913 | -1.181560 | -0.000001 |
| C | 0.210037  | -1.421748 | 0.000006  |
| H | 0.492348  | -2.477803 | 0.000000  |
| C | 1.297357  | -0.551983 | 0.000019  |
| C | 2.640405  | -0.986300 | 0.000012  |
| C | 2.530660  | 1.216448  | -0.000001 |
| N | 1.293918  | 0.840478  | 0.000018  |
| N | 3.411191  | 0.116932  | -0.000016 |
| C | 3.037540  | 2.613118  | -0.000002 |
| H | 3.650678  | 2.814351  | -0.889288 |
| H | 2.181931  | 3.292885  | 0.000012  |
| H | 3.650702  | 2.814344  | 0.889270  |
| O | 3.060151  | -2.239312 | 0.000046  |
| C | 4.862309  | 0.206421  | -0.000030 |
| H | 5.205542  | 0.734080  | -0.896466 |
| H | 5.205561  | 0.734095  | 0.896389  |
| H | 5.308321  | -0.794021 | -0.000028 |
| C | -2.051100 | -2.283006 | -0.000014 |
| H | -1.810773 | -3.342372 | -0.000018 |
| C | -2.015205 | 0.011009  | 0.000000  |
| C | -3.344438 | -0.452658 | -0.000011 |
| N | -3.309229 | -1.853578 | -0.000018 |
| H | -4.123280 | -2.452705 | -0.000026 |
| C | -4.455279 | 0.384182  | -0.000013 |
| C | -1.789457 | 1.392837  | 0.000008  |
| C | -4.204558 | 1.750742  | -0.000004 |
| C | -2.889724 | 2.243014  | 0.000006  |
| H | -5.471025 | -0.008505 | -0.000021 |
| H | -5.040835 | 2.448339  | -0.000005 |
| H | -2.729058 | 3.320226  | 0.000013  |
| H | -0.774936 | 1.779607  | 0.000017  |
| H | 4.020654  | -2.317938 | 0.000040  |

**Z-Cyan<sup>+</sup> – protomer III**       $E_{\text{HF}} = -780.990340 \text{ au}$

|   |           |           |           |
|---|-----------|-----------|-----------|
| C | -1.160805 | -1.223777 | -0.000002 |
| C | 0.274983  | -1.444742 | -0.000001 |
| H | 0.579145  | -2.493307 | 0.000000  |
| C | 1.303408  | -0.574333 | -0.000002 |
| C | 2.722718  | -1.094600 | 0.000000  |
| C | 2.602997  | 1.140559  | -0.000004 |
| N | 1.337013  | 0.813468  | -0.000003 |
| N | 3.476590  | 0.075016  | -0.000003 |
| C | 3.103431  | 2.536931  | -0.000002 |
| H | 3.728149  | 2.717605  | -0.885581 |
| H | 2.258562  | 3.229143  | -0.000027 |
| H | 3.728101  | 2.717615  | 0.885609  |
| O | 3.136027  | -2.227891 | 0.000003  |
| C | 4.927197  | 0.116010  | 0.000005  |
| H | 5.301406  | 0.623583  | -0.896755 |
| H | 5.301396  | 0.623586  | 0.896767  |
| H | 5.279423  | -0.919940 | 0.000008  |
| C | -2.007482 | -2.277125 | -0.000001 |
| H | -1.822230 | -3.345070 | 0.000000  |
| C | -1.974888 | 0.017327  | 0.000000  |
| C | -3.319807 | -0.347102 | -0.000001 |
| N | -3.409539 | -1.819690 | 0.000000  |
| H | -3.913495 | -2.161557 | -0.825860 |
| C | -4.383778 | 0.530708  | 0.000000  |
| C | -1.663453 | 1.376017  | 0.000002  |
| C | -4.052672 | 1.888374  | 0.000002  |
| C | -2.715951 | 2.294318  | 0.000002  |
| H | -5.421330 | 0.198330  | 0.000000  |
| H | -4.847885 | 2.631983  | 0.000003  |
| H | -2.487781 | 3.359251  | 0.000004  |
| H | -0.622024 | 1.690509  | 0.000002  |
| H | -3.913493 | -2.161556 | 0.825862  |

**Z-Cyan<sup>+</sup> – protomer IV**       $E_{HF} = -780.991886$  au

|   |           |           |           |
|---|-----------|-----------|-----------|
| C | -1.158982 | -1.198311 | -0.027389 |
| C | 0.221885  | -1.455489 | -0.084047 |
| H | 0.490226  | -2.515475 | -0.091517 |
| C | 1.323137  | -0.626641 | -0.133675 |
| C | 2.649233  | -1.168610 | -0.189134 |
| C | 2.534169  | 1.223102  | -0.189943 |
| N | 1.347924  | 0.777295  | -0.139222 |
| N | 3.545080  | 0.131196  | -0.226925 |
| C | 2.985399  | 2.637003  | -0.216520 |
| H | 3.626603  | 2.832915  | -1.087783 |
| H | 2.103871  | 3.281503  | -0.270041 |
| H | 3.555098  | 2.891154  | 0.688265  |
| O | 3.177347  | -2.237686 | -0.201724 |
| C | 4.548626  | 0.133027  | 0.876325  |
| H | 5.223797  | 0.983995  | 0.752579  |
| H | 4.008867  | 0.204566  | 1.825599  |
| H | 5.100917  | -0.809863 | 0.823788  |
| C | -2.049660 | -2.286139 | 0.014455  |
| H | -1.819407 | -3.347575 | 0.009175  |
| C | -1.994412 | 0.001982  | 0.002126  |
| C | -3.328487 | -0.448181 | 0.059879  |
| N | -3.308699 | -1.845045 | 0.065113  |
| H | -4.126871 | -2.436361 | 0.101424  |
| C | -4.429495 | 0.403027  | 0.102088  |
| C | -1.759435 | 1.383767  | -0.014065 |
| C | -4.167371 | 1.765959  | 0.085048  |
| C | -2.848132 | 2.245588  | 0.027602  |
| H | -5.448106 | 0.020211  | 0.146338  |
| H | -4.996064 | 2.471828  | 0.116533  |
| H | -2.677075 | 3.321194  | 0.015437  |
| H | -0.745527 | 1.767861  | -0.058645 |
| H | 4.035902  | 0.130910  | -1.126622 |

**E-Cyan<sup>+</sup> – protomer I**       $E_{HF} = -781.213953$  au

|   |           |           |           |
|---|-----------|-----------|-----------|
| C | 1.141933  | -1.279560 | -0.005247 |
| C | -0.221188 | -1.593617 | -0.163421 |
| H | -0.419285 | -2.651835 | -0.316959 |
| C | -1.332220 | -0.805847 | -0.141842 |
| C | -1.565346 | 0.534925  | 0.369879  |
| C | -3.545963 | -0.392296 | -0.250650 |
| N | -2.615756 | -1.300704 | -0.463728 |
| N | -2.986557 | 0.708211  | 0.242971  |
| C | -4.988408 | -0.561925 | -0.519370 |
| H | -5.325969 | 0.192138  | -1.230680 |
| H | -5.197318 | -1.549100 | -0.922309 |
| H | -5.556001 | -0.427290 | 0.401719  |
| O | -0.847406 | 1.356047  | 0.869382  |
| C | -3.669817 | 1.922829  | 0.648861  |
| H | -4.159704 | 2.388758  | -0.203549 |
| H | -4.399060 | 1.708819  | 1.427270  |
| H | -2.911261 | 2.593804  | 1.042469  |
| C | 2.046785  | -2.280444 | 0.350410  |
| H | 1.854226  | -3.323917 | 0.540953  |
| C | 1.927416  | -0.066722 | -0.152396 |
| C | 3.248964  | -0.411629 | 0.165306  |
| N | 3.268983  | -1.765073 | 0.480618  |
| H | 4.087686  | -2.283069 | 0.746649  |
| C | 4.308432  | 0.479049  | 0.100042  |
| C | 1.673735  | 1.223156  | -0.616471 |
| C | 4.020829  | 1.759262  | -0.325917 |
| C | 2.720490  | 2.119535  | -0.691316 |
| H | 5.315622  | 0.182429  | 0.356815  |
| H | 4.814647  | 2.489150  | -0.393402 |
| H | 2.532143  | 3.124250  | -1.041685 |
| H | 0.683495  | 1.527421  | -0.909807 |
| H | -2.800531 | -2.197274 | -0.878777 |

**E-Cyan<sup>+</sup> – protomer II**       $E_{\text{HF}} = -781.192002 \text{ au}$

|   |           |           |           |
|---|-----------|-----------|-----------|
| C | -1.111880 | -1.292770 | 0.006961  |
| C | 0.235691  | -1.614484 | -0.129595 |
| H | 0.456555  | -2.671010 | -0.249078 |
| C | 1.382132  | -0.834963 | -0.135189 |
| C | 1.637954  | 0.451483  | 0.370382  |
| C | 3.503192  | -0.486134 | -0.337104 |
| N | 2.601905  | -1.377953 | -0.539058 |
| N | 2.953828  | 0.673328  | 0.235749  |
| C | 4.948436  | -0.605336 | -0.643528 |
| H | 5.557331  | -0.495552 | 0.254688  |
| H | 5.125513  | -1.589319 | -1.066417 |
| H | 5.265704  | 0.147418  | -1.366368 |
| O | 0.803114  | 1.276019  | 0.964835  |
| C | 3.654472  | 1.865450  | 0.674069  |
| H | 3.653055  | 1.938391  | 1.762124  |
| H | 4.684096  | 1.813639  | 0.336519  |
| H | 3.201434  | 2.755086  | 0.236516  |
| C | -2.033057 | -2.288177 | 0.368583  |
| H | -1.845213 | -3.330927 | 0.568695  |
| C | -1.893142 | -0.076168 | -0.159540 |
| C | -3.215922 | -0.407379 | 0.160327  |
| N | -3.243569 | -1.761765 | 0.493005  |
| H | -4.067384 | -2.271089 | 0.763874  |
| C | -4.270819 | 0.484537  | 0.073903  |
| C | -1.633951 | 1.196237  | -0.662266 |
| C | -3.976433 | 1.754360  | -0.381886 |
| C | -2.676497 | 2.097285  | -0.761466 |
| H | -5.280590 | 0.198196  | 0.331772  |
| H | -4.767262 | 2.485158  | -0.469536 |
| H | -2.487219 | 3.087013  | -1.151960 |
| H | -0.646549 | 1.475677  | -0.992160 |
| H | 1.239402  | 2.050255  | 1.332869  |
